# Supplementary material for: The effect of local delivery of adiponectin from biodegradable microsphere–scaffold composites on new bone formation in adiponectin knockout mice
Source: Royal Society of Chemistry journal article supplement (doi:10.1039/c6tb00704j), 2016-01-01
Supplement: c6tb00704j1.pdf [file c6tb00704j1.pdf]

**The effect of local delivery of adiponectin from biodegradable microsphere-scaffold composite on new bone formation in adiponectin knockout mice**

Dan Li<sup>1,2†</sup>, Yuan Guo<sup>1,2†</sup>, Hui Lu<sup>1,2†</sup>, Ren Wang<sup>1,2</sup>, Song-he Lu<sup>1,2</sup>, Xue-fen Li<sup>2</sup>, Zi-chen Li<sup>3</sup>, Yu-wei Wu<sup>\*1,2</sup> Zhi-hui Tang<sup>\*1,2</sup>

<sup>1</sup> 2<sup>nd</sup> Dental Center, Peking University School and Hospital of Stomatology, Beijing, China;

<sup>2</sup> National Engineering Laboratory for Digital and Material Technology of Stomatology, Peking University School and Hospital of Stomatology, Beijing, China;

<sup>3</sup> Department of Polymer Science & Engineering College of Chemistry & Molecular Engineering, Peking University, Beijing, China

† These authors equally contributed.

**\*Address for reprint requests and other correspondence:** Yu-wei Wu or Zhi-hui Tang, 2<sup>nd</sup> Dental Center, Peking University School and Hospital of Stomatology, B5 Anli Garden, #66 Anli Road, Chao Yang District, Beijing, China 100101 (e-mail: yuweiwu@bjmu.edu.cn, tang\_zhihui@live.cn ; fax: 8610-64907970).

**Supplementary data 1.**

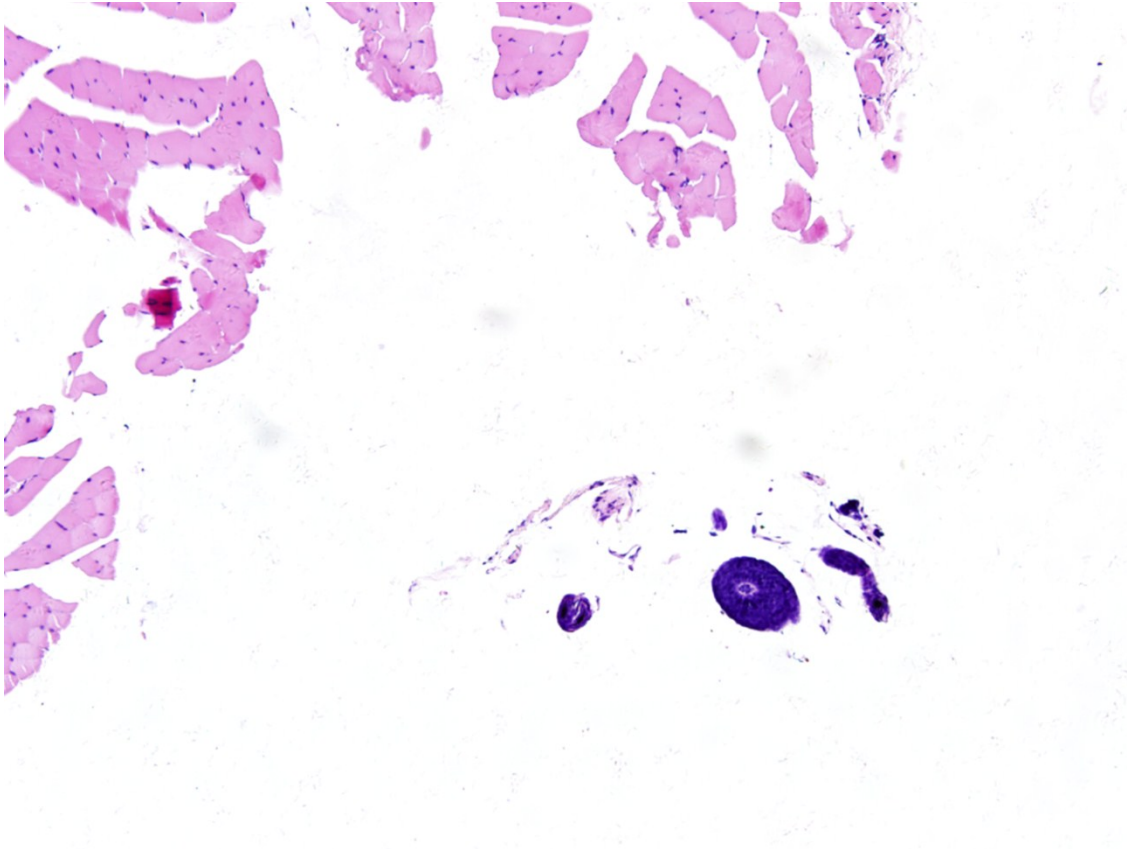

## Supplementary data 2.

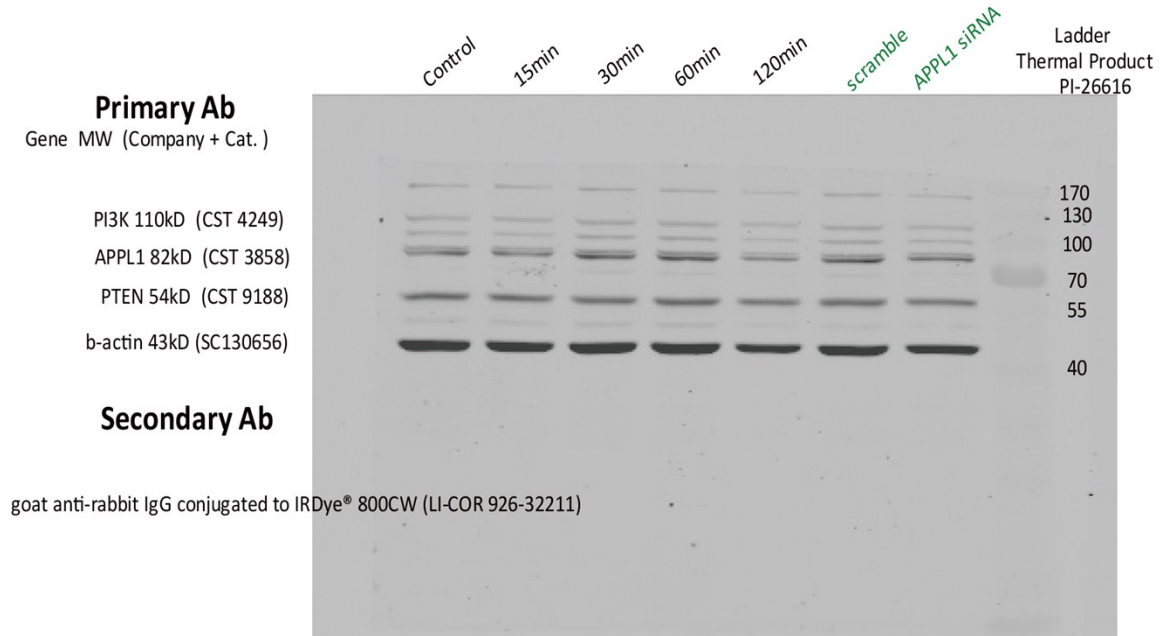

The image was scanned by Odyssey® Infrared Imaging System

**Supplementary data 3.**

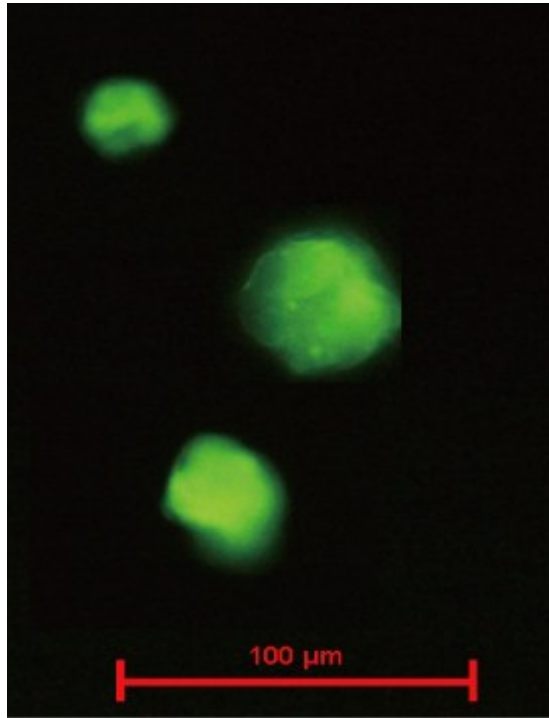

## **Figure Legends**

**Supplementary data 1.** The full-length pictures of the muscle tissues dye by H&E in the Figure 2.

**Supplementary data 2.** The gels had been run under the same experimental conditions and the full-length gels and blots were provided.

**Supplementary data 3.** Fluorescence-labeled protein encapsulation assay. To verify encapsulation of protein into CM particle, fluorescein isothiocyanate-conjugated bovine serum albumin (FITC-BSA)-loaded chitosan particles were prepared by a similar procedure as shown in the article. Fluorescence detection was performed with the confocal laser scanning fluorescence microscope at 520nm. Fluorescent CM particles were observed under microscope, indicating FITC-BSA was successfully loaded. Therefore, bioactive protein incorporated chitosan particle was confirmed.
